# Supplementary material for: Walking and Walkability in Pre-Set and Self-Defined Neighborhoods: A Mental Mapping Study in Older Adults
Source: MDPI journal article supplement (doi:10.3390/ijerph15071363), 2018-06-28
Supplement: s1 [file s1]

**Symbols**

|        |                               |
|--------|-------------------------------|
| $\rho$ | density                       |
| $p$    | area                          |
| $t$    | intersection                  |
| $b$    | building floor area footprint |

Utilization types of a particular land parcel feature or building

Main categories (codes)

|   |                                            |
|---|--------------------------------------------|
| L | living                                     |
| C | commercial                                 |
| S | services                                   |
| I | industrial                                 |
| T | institutional                              |
| R | recreational                               |
| O | other (e.g. road space, agricultural area) |
| W | water (excluded)                           |

Sub-categories (codes)

To allow for mixed land use within a particular land parcel feature or building, e.g. "L-C-S" to code a combined use of living, commercial, and services. Sub-categories formed discrete utilization types and were entered equally into the calculation of indices.

**Equations**

Pedestrian connectivity of a particular district

$$\rho_t = \frac{t}{p} \quad (1)$$

where

|          |                                                                                                                                                                           |
|----------|---------------------------------------------------------------------------------------------------------------------------------------------------------------------------|
| $\rho_t$ | intersection density                                                                                                                                                      |
| $t$      | number of intersections (valence $\geq 3$ ) based on the street, pedestrian, and bicycle networks, while merging all crossings within a straight line radius of 15 meters |
| $p$      | total land area of a district; water areas excluded                                                                                                                       |

Household density of a particular district

$$\rho_h = \frac{h}{p_l} \quad (2)$$

where:

|          |                                                                                                                          |
|----------|--------------------------------------------------------------------------------------------------------------------------|
| $\rho_h$ | household density                                                                                                        |
| $h$      | number of households                                                                                                     |
| $p_l$    | area used for living, i.e. land parcel feature coded as living (L) or a sub-category including living (L-C, L-C-S, ... ) |

Retail floor area ratio of a particular district

$$rFAR = \frac{\sum b_c}{p_c} \quad (3)$$

where

|        |                                                                                                                                                          |
|--------|----------------------------------------------------------------------------------------------------------------------------------------------------------|
| $rFAR$ | retail floor area ratio                                                                                                                                  |
| $b_c$  | floor area footprint of a particular commercial building, i.e. buildings coded as commercial (C) or a sub-category including commerce (L-C, L-C-S, ... ) |
| $p_c$  | area used for commerce, i.e. land parcel feature coded as commercial (C) or a sub-category including commerce (L-C, L-C-S, ... )                         |

Land use mix of a particular district

$$H(S) = \frac{-\sum_{i=1}^k [(p_i) \times (\ln p_i)]}{\ln k} \quad (4)$$

where

**$H(S)$**  Entropy index (Shannon's index)

**$p_i$**  area of a particular utilization type (main and sub-categories) over the total land area of a district;  
water areas excluded.

**$k$**  number of applicable utilization types in the particular district

Adapted from: Dobesova, Z.; Krivka, T. Walkability Index in the Urban Planning: A Case Study in Olomouc City. In *Advances in Spatial Planning*; Burian, J., Ed.; InTech: Shanghai, China, 2012, pp. 180–196.
